# Supplementary material
Source: publisher figshare collection journal article supplement (https://frontiersin.figshare.com/ndownloader/files/21196125)
Supplement: Supplementary file 1 [file 21196125]

Supplementary Material

# Supplementary Figures and Tables

**Table S-1.** Number of samples performed at each location.

|  | **F-CCE Center** | | **F-CCE Edge** | | **B-CCE** | | | | **R-WCE** | | | | **WCE** | | | |
| --- | --- | --- | --- | --- | --- | --- | --- | --- | --- | --- | --- | --- | --- | --- | --- | --- |
|  | **EZ** | | **EZ** | | **EZ** | | **MIDOC** | | **EZ** | | **MIDOC** | | **EZ** | | **MIDOC** | |
| **Depth (m)** | **Day** | **Night** | **Day** | **Night** | **Day** | **Night** | **Day** | **Night** | **Day** | **Night** | **Day** | **Night** | **Day** | **Night** | **Day** | **Night** |
| **0 – 100** | 2 | 2 | 2 | 2 | 2 | 2 | 1 | 2 | 1 | 2 | 1 | 1 | 1 | 1 | 1 | 1 |
| **100 – 200** | 2 | 2 | 2 | 2 | 2 | 2 | 1 | 2 | 1 | 2 | 2 | 1 | 1 | 1 | 2 | 1 |
| **200 – 300** | 1 | 2 | 2 | 2 | 2 | 2 | 1 | 2 | 1 | 2 | 3 | 1 | 1 | 1 | 1 | 1 |
| **300 – 400** | 1 | 2 | 2 | 2 | 2 | 2 | 2 | 2 | 1 | 2 | 2 | 1 | 1 | 1 | 1 | 1 |
| **400 – 500** | 2 | 2 | 2 | 2 | 2 | 2 | 2 | 2 | 1 | 2 | 2 | 1 | 1 | 1 | 1 | 1 |
| **500 – 600** | 0 | 0 | 0 | 0 | 0 | 0 | 3 | 0 | 0 | 0 | 1 | 1 | 0 | 0 | 1 | 1 |
| **600 - 700** | 0 | 0 | 0 | 0 | 0 | 0 | 1 | 0 | 0 | 0 | 0 | 1 | 0 | 0 | 1 | 1 |
| **700 – 800** | 0 | 0 | 0 | 0 | 0 | 0 | 2 | 0 | 0 | 0 | 0 | 1 | 0 | 0 | 1 | 1 |
| **800 - 1000** | 0 | 0 | 0 | 0 | 0 | 0 | 2 | 0 | 0 | 0 | 0 | 1 | 0 | 0 | 2 | 1 |

**Table S-2**. Presence/absence species list for MIDOC catches, where 1=present and 0=absent in the B-CCE, R-WCE, and WCE in September 2017.

| **Family** | **Species** | **B-CCE** | **R-WCE** | **WCE** |
| --- | --- | --- | --- | --- |
| Diretmidae | Diretmus argenteus | 1 | 1 | 1 |
| Microstomatidae | Bathylagichthys problematicus | 0 | 0 | 0 |
| Bathylagidae | Bathylagus sp | 1 | 1 | 0 |
| Bramidae | Brama brama | 1 | 0 | 0 |
| Bregmacerotidae | Bregmaceros sp | 1 | 1 | 0 |
| Carapidae | Carapidae sp | 0 | 1 | 0 |
| Chaunacidae | Chaunax sp | 1 | 1 | 0 |
| Chiasmodontidae | Chiasmodon sp | 0 | 1 | 0 |
| Ceratiidae | Cryptopsaras couesii | 0 | 0 | 1 |
| Centrolophidae | Cubiceps caeruleus | 0 | 0 | 0 |
| Gonostomatidae | Cyclothone sp | 1 | 1 | 1 |
| Carangidae | Decapterus sp | 0 | 0 | 0 |
| Setarchidae | Ectreposebastes niger | 0 | 0 | 1 |
| Gigantactinidae | Gigantactis vanhoeffeni | 1 | 0 | 0 |
| Cetomimidae | Gyrinomimus grahami | 1 | 0 | 0 |
| Ceratiidae | Himantolophus sp | 0 | 0 | 1 |
| Howellidae | Howella sherborni | 0 | 1 | 0 |
| Howellidae | Howella sp | 0 | 1 | 0 |
| Phosichthyidae | Ichthyococcus australis | 1 | 0 | 1 |
| Phosichthyidae | Ichthyococcus ovatus | 1 | 1 | 0 |
| Tetraodontidae | Lagocephalus sp | 1 | 0 | 0 |
| Macroramphosidae | Macroramphosus scolopax | 1 | 1 | 0 |
| Paralepididae | Magnisudis | 0 | 0 | 1 |
| Paralepididae | Magnisudis Prionosa | 1 | 0 | 0 |
| Melamphaidae | Melamphaes simus | 1 | 1 | 1 |
| Melanocetidae | Melanocetus johnsoni | 1 | 0 | 0 |
| Ceratiidae | Melanocetus johnsonii | 1 | 0 | 0 |
| Bathylagidae | Melanolagus bericoides | 1 | 1 | 1 |
| Chiasmodontidae | Microcephalus | 0 | 0 | 1 |
| Stomiidae | Neonesthes capensis | 0 | 0 | 1 |
| Derichthyidae | Nessorhamphus ingolfianus | 1 | 0 | 0 |
| Nomeidae | Nomeidae sp | 1 | 0 | 0 |
| Phosichthyidae | Phosichthys argenteus | 1 | 0 | 1 |
| Caristiidae | Platyberyx rhyton | 1 | 0 | 0 |
| Melamphaidae | Poromitra | 0 | 0 | 1 |
| Melamphaidae | Poromitra gibbsi | 1 | 0 | 0 |
| Scopelarchidae | Scopelarchoides | 0 | 0 | 1 |
| Trachipteridae | Trachipteris sp | 1 | 0 | 0 |
| Phosichthyidae | Vinciguerra poweriae | 1 | 0 | 0 |
| Phosichthyidae | Vinciguerria poweriae | 1 | 1 | 1 |
| Alepocephalidae | Xenodermichthys copei | 1 | 0 | 0 |
| Grammicolepididae | Xenolepidichthys dalgleishi | 1 | 1 | 1 |
| Zeniontidae | Zenion sp | 0 | 1 | 0 |
| Sternoptychidae | Argyropelecus | 1 | 1 | 1 |
| Sternoptychidae | Argyropelecus aculeatus | 1 | 1 | 0 |
| Sternoptychidae | Argyropelecus gigas | 1 | 1 | 1 |
| Sternoptychidae | Argyropelecus hemigymnus | 1 | 1 | 1 |
| Sternoptychidae | Argyropelecus olfersii | 1 | 1 | 0 |
| Sternoptychidae | Polyipnus | 1 | 0 | 1 |
| Sternoptychidae | Polyipnus aquavitus | 1 | 0 | 0 |
| Sternoptychidae | Polyipnus ruggeri | 1 | 1 | 0 |
| Sternoptychidae | Polyipnus stereope | 1 | 0 | 0 |
| Sternoptychidae | Sternoptyx | 1 | 0 | 1 |
| Sternoptychidae | Sternoptyx Diaphana | 1 | 1 | 0 |
| Sternoptychidae | Valencienellus tripunctatus | 1 | 0 | 0 |
| Ceratiidae | Ceratioid | 1 | 0 | 0 |
| Molidae | Mola sp | 0 | 1 | 0 |
| Carapidae | Vexillifer sp | 0 | 1 | 0 |
| Opisthoproctidae | Dolichopteryx | 0 | 0 | 1 |
| Howellidae | Howella brodiei | 0 | 0 | 1 |
| Bathylagidae | Melanolagus gracilus | 0 | 0 | 1 |
| Paralepididae | Nesiarchus nasutus | 0 | 0 | 1 |
| Alepocephalidae | Photostylus argenteus | 0 | 0 | 1 |
| Melamphaidae | Scopelogadus beanii | 0 | 1 | 1 |
| Myctophidae | Electrona | 0 | 0 | 0 |
| Myctophidae | Electrona risso | 1 | 0 | 1 |
| Myctophidae | Benthosema suborbitale | 1 | 1 | 0 |
| Myctophidae | Bolinichthys longipes | 1 | 0 | 0 |
| Myctophidae | Ceratobranchus sp | 0 | 1 | 0 |
| Myctophidae | Ceratoscopelus warmingii | 1 | 1 | 1 |
| Myctophidae | Diaphus brachycephalus | 1 | 0 | 0 |
| Myctophidae | Diaphus danae | 0 | 0 | 0 |
| Myctophidae | Diaphus fragilis | 0 | 1 | 0 |
| Myctophidae | Diaphus hudsoni | 1 | 0 | 1 |
| Myctophidae | Diaphus meadi | 0 | 0 | 0 |
| Myctophidae | Diaphus metopoclampus | 1 | 0 | 0 |
| Myctophidae | Diaphus perspcillatus | 0 | 1 | 0 |
| Myctophidae | Diaphus phillipsi | 1 | 0 | 0 |
| Myctophidae | Diaphus sp | 1 | 1 | 1 |
| Myctophidae | Hygophum hygomii | 0 | 1 | 1 |
| Myctophidae | Hygophum sp | 0 | 1 | 0 |
| Myctophidae | Lampadena sp | 1 | 1 | 0 |
| Myctophidae | Lampanyctus | 0 | 0 | 1 |
| Myctophidae | Lampanyctus alatus | 1 | 1 | 0 |
| Myctophidae | Lampanyctus festivus | 0 | 1 | 1 |
| Myctophidae | Lobianchia dofleini | 0 | 1 | 0 |
| Myctophidae | Lobianchia sp | 0 | 1 | 0 |
| Myctophidae | Myctophum | 0 | 0 | 0 |
| Myctophidae | Myctophum phengodes | 0 | 1 | 1 |
| Myctophidae | Notoscopelus resplendens | 0 | 0 | 0 |
| Myctophidae | Notoscopelus sp | 0 | 1 | 0 |
| Myctophidae | Scopelopsis multipunctatus | 1 | 1 | 1 |
| Myctophidae | Symbolophorus barnardi | 0 | 0 | 0 |
| Myctophidae | Symbolophorus sp | 0 | 1 | 0 |
| Myctophidae | Lampanyctus | 0 | 0 | 1 |
| Myctophidae | Lampanyctus pusillus | 0 | 0 | 0 |
| Myctophidae | Nannobrachium | 1 | 1 | 1 |
| Myctophidae | Nannobrachium achirus | 0 | 0 | 1 |
| Myctophidae | Nannobrachium atrum | 1 | 1 | 1 |
| Myctophidae | Nannobrachium sp | 1 | 0 | 0 |
| Myctophidae | Nannobrachium wisneri | 1 | 0 | 0 |
| Myctophidae | Scopelogudus beanii | 0 | 0 | 1 |
| Myctophidae | Scopelopsis | 0 | 0 | 1 |
| Myctophidae | Scopelopsis mizolepis | 0 | 0 | 1 |
| Scopelarchidae | Scopelopsis sp | 1 | 0 | 0 |
| Dalatiidae | Isistius brasiliensis | 1 | 1 | 0 |
| Alepisauridae | Alepisaurus brevirostris | 1 | 0 | 0 |
| Trichiuridae | Benthodesmus elongatus | 1 | 1 | 0 |
| Derichthyidae | Derichthys serpentinus | 0 | 0 | 1 |
| Gempylidae | Diplospinus multistriatus | 1 | 0 | 0 |
| Stomiidae | Flagellastomias | 1 | 0 | 0 |
| Stomiidae | Idiacanthus | 0 | 1 | 0 |
| Trichiuridae | Lepidopus caudatus | 0 | 0 | 0 |
| Stomiidae | Leptostomias | 0 | 0 | 1 |
| Gonostomatidae | Margrethia obtusirostra | 0 | 1 | 0 |
| Gonostomatidae | Margrethia valentinae | 0 | 0 | 0 |
| Nemichthidae | Nemichthys scolopaceus | 0 | 1 | 0 |
| Nemichthyidae | Nemichthys sp | 0 | 1 | 0 |
| Gempylidae | Neolatus tripes | 1 | 0 | 0 |
| Notosudidae | Notosudidae | 0 | 1 | 0 |
| Paralepididae | Paralepididae | 1 | 1 | 0 |
| Regalecidae | Regalecus glesne | 1 | 0 | 0 |
| Notosuididae | Scopelosaurus sp | 1 | 0 | 0 |
| Serrivomeridae | Serrivomer sp | 1 | 0 | 0 |
| Gonostomatidae | Sigmops elongatus | 1 | 1 | 1 |
| Paralepididae | Stemonosudis sp | 1 | 1 | 0 |
| Anoplogastridae | Anoplogaster cornuta | 1 | 1 | 0 |
| Stomiidae | Astronesthes bilobaus | 0 | 0 | 1 |
| Stomiidae | Astronesthes indopacificus | 1 | 0 | 0 |
| Stomiidae | Astronesthes sp | 1 | 0 | 0 |
| Stomiidae | Astronesthes trifibulatus | 0 | 0 | 1 |
| Stomiidae | Astronesthinae | 1 | 0 | 0 |
| Stomiidae | Bathophilus abarbatus | 1 | 1 | 1 |
| Stomiidae | Bathophilus sp | 1 | 1 | 0 |
| Stomiidae | Chauliodus sloani | 1 | 1 | 1 |
| Evermannellidae | Coccorella atlantica | 1 | 1 | 0 |
| Stomiidae | Coccorella atrata | 0 | 1 | 0 |
| Gonostomatidae | Diplophos australis | 0 | 1 | 0 |
| Stomiidae | Eustomias sp | 0 | 1 | 1 |
| Evermannellidae | Evermannella indica | 1 | 0 | 0 |
| Evermannellidae | Evermannella sp | 1 | 0 | 0 |
| Stomiidae | Flagellastomias baureei | 1 | 0 | 0 |
| Linophrynidae | Haplophryne mollis | 1 | 1 | 0 |
| Stomiidae | Hymantolophis sp | 0 | 1 | 0 |
| Stomiidae | Idiacanthus atlanticus | 0 | 1 | 1 |
| Stomiidae | Leptostomias haplocaulus | 1 | 0 | 0 |
| Stomiidae | Malacosteus australis | 0 | 0 | 1 |
| Stomiidae | Malacosteus niger | 1 | 0 | 0 |
| Stomiidae | Malacosteus sp | 1 | 1 | 1 |
| Stomiidae | Melanostomias | 0 | 0 | 1 |
| Stomiidae | Melanostomias melanops | 1 | 0 | 0 |
| Evermannellidae | Odontosomops normalops | 1 | 0 | 0 |
| Stomiidae | Photonectes achirus | 0 | 0 | 1 |
| Stomiidae | Photonectes sp | 0 | 1 | 0 |
| Melamphaidae | Scopelogadus mizolepis | 1 | 0 | 0 |
| Stomiidae | Stomias | 0 | 0 | 0 |
| Stomiidae | Stomias boa | 0 | 0 | 1 |
| Stomiidae | Stomias longibarbatus | 1 | 0 | 0 |
| Phronimidae | Phronima sp | 1 | 1 | 1 |
|  | Ancistiocheirus lesueurii | 0 | 1 | 0 |
| Cranchiidae | Leachia | 0 | 0 | 0 |
| Pyroteuthidae | Pterygioteuthis | 0 | 0 | 0 |
| Octopoteuthidae | Taningia danae | 0 | 0 | 0 |
| Decapods |  | 1 | 1 | 0 |
| Pyrosomidae | Pyrosoma atlanticum | 1 | 1 | 1 |

**Table S-3**. Length-weight relationships used to calculate carbon weight for micronekton captured in the MIDOC.

| **Group** | **Species** | **Regression** |
| --- | --- | --- |
| Chaetognath | Chaetognath1,2 |  |
| Crustacean | Amphipod1,3 |  |
| Crustacean | Decapod1,4 |  |
| Crustacean | Euphausiid1,3 |  |
| Crustacean | Isopod1,5,6 |  |
| Fish | Alepisauridae7 | ) |
| Fish | Alepocephalidae8 |  |
| Fish | Anoplogastridae7 | ) |
| Fish | Bathylagidae7 | ) |
| Fish | Bramidae8 |  |
| Fish | Bregmacerotidae7,9,10 |  |
| Fish | Carangidae7 |  |
| Fish | Carapidae7 |  |
| Fish | Caristiidae7 |  |
| Fish | Centrolophidae7 |  |
| Fish | Ceratiidae7 | ) |
| Fish | Cetomimidae7 |  |
| Fish | Chaunacidae7 |  |
| Fish | Chiasmodontidae7 |  |
| Fish | Dalatiidae7,9 |  |
| Fish | Derichthyidae7 | ) |
| Fish | Diretmidae7 | ) |
| Fish | Emmelichthyidae7 |  |
| Fish | Epigonidae7 | ) |
| Fish | Evermannellidae7 | ) |
| Fish | Gempylidae7,9 |  |
| Fish | Gigantactinidae7 | ) |
| Fish | Gonostomatidae9,11 |  |
| Fish | Grammicolepididae7 | ) |
| Fish | Howellidae9 |  |
| Fish | Leptocephalus9 |  |
| Fish | Linophrynidae7 |  |
| Fish | Macroramphosidae7 | ) |
| Fish | Melamphaidae9,11 |  |
| Fish | Melanocetidae7 |  |
| Fish | Microstomatidae7 | ) |
| Fish | Myctophidae9,11 |  |
| Fish | Nemichthyidae7 |  |
| Fish | Nomeidae7,9 | ) |
| Fish | Notosudidae7 | ) |
| Fish | Opisthoproctidae8,9 |  |
| Fish | Photostylus argenteus13 |  |
| Fish | Paralepididae7,9,10 |  |
| Fish | Phosichthyidae9,11 |  |
| Fish | Pleuronectiformes7 | ) |
| Fish | Regalecidae7 | ) |
| Fish | Serrivomeridae13,14,15 | ) |
| Fish | Setarchidae7 | ) |
| Fish | Sternoptychidae9,11 |  |
| Fish | *Sternoptyx* spp. 9,11 |  |
| Fish | Stomiidae9,11 |  |
| Fish | Tetraodontidae7 | ) |
| Fish | Trachipteridae7 | ) |
| Fish | Trichiuridae8,9 |  |
| Fish | Unidentified Fish7 |  |
| Fish | Zeniontidae7 | ) |
| Jellyfish | Jellyfish3,16,17 |  |
| Mollusk | Cephalopod12,14 |  |
| Mollusk | Heterpod18 |  |
| Mollusk | Mollusk1,3 |  |
| Tunicate | Pyrosome19 |  |
| Polychaete | Polychaete1,3,20 |  |
| **References**  1Kiørboe (2013)  2Feigenbaum (1979)  3Mizdalski (1988)  4Podeswa (2012)  5Strong and Dabron (1979)  6Defeo and Martinez (2003)  7Froese et al., (2014)  8Individual measurements in lab  9Childress et al., (1990)  10Bernardes and Rossi-Wongtschowski (2000) | | 11Davison (2011)  12Lindsay (2003)  13Pakhomov (Unpublished data)  14Villanueva and Guerra, (1991)  15Alpoim et al., (2002)  16Haddad and Nogueira (2006)  17Uye and Shimauchi (2005)  18Davis and Wiebe (1985)  19Henschke et al. (2019)  20Uye (1982) |

**Table S-4.** Testing the assumptions of ANOVA. The results for Bartlett’s test of homogeneity of variance and Shapiro-Wilk’s test for normality for total water column mesozooplankton and micronekton.

|  | Test | K | W | DF | p |
| --- | --- | --- | --- | --- | --- |
| Mesozooplankton | Bartlett’s test | 1.3146 | - | 3 | 0.7257 |
|  | Shapiro-Wilk’s | - | 0.90976 | - | 0.1563 |
| Micronekton | Bartlett’s test | 0.74924 | - | 2 | 0.6878 |
|  | Shapiro-Wilk’s | - | 0.90585 | - | 0.1609 |

**Table S-5**. Results of ANOVA comparing day and night total water column mesozooplankton (EZ net) and micronekton (MIDOC) biomass captured in the F-CCE Center, F-CCE Edge, B-CCE, R-WCE and WCE.

|  | F-value | df | p |
| --- | --- | --- | --- |
| *Mesozooplankton* |  |  |  |
| F-CCE Center | 143.2 | 1,2 | 0.007 |
| F-CCE Edge | 0.28 | 1,2 | 0.649 |
| B-CCE | 0.136 | 1,2 | 0.748 |
| R-WCE | - | - | - |
| WCE | - | - | - |
| *Micronekton* |  |  |  |
| B-CCE | 1.204 | 1,3 | 0.353 |
| R-WCE | 0.653 | 1,2 | 0.504 |
| WCE | 1.698 | 1,2 | 0.322 |

**Table S-6.** Regression equations used to calculate respiratory oxygen uptake (RO; µL O2.ind.-1 h-1), where DW is individual dry weight (mg), WW is individual wet weight (mg), T is temperature (ºC), and D is depth (m).

| Taxa | Regression | RQ | R2 |
| --- | --- | --- | --- |
| Fish1* |  | 2.5 | 0.952 |
| Lophiiformes1 |  | 2.5 | 0.952 |
| Myctophidae1,2 |  | 3.9 | 0.952 |
| Cephalopoda1 |  | 2.62 | 0.938 |
| Euphausiacea3 |  | 1.7 | 0.867 |
| Copepoda and Molluska4 |  | 1.58 | 0.934 |
| Amphipoda4 |  | 1.45 | 0.934 |
| Decapoda4 |  | 2.69 | 0.934 |
| Chaetognath4 |  | 1.67 | 0.934 |
| Polychaeta4 |  | 1.9 | 0.934 |
| Pyrosome5 |  | 2.8 | 0.95 |
| 1Ikeda (2016)  2Donnelly and Torres (1988)  3Ikeda (2013)  4Ikeda (2014)  5Henschke et al. (2019)  *This equation applies to the following groups of fishes included in our data set: Anguilliformes, Beryciformes, Lophiiformes, Myctophiformes, Osmeriformes, Stephanoberyciformes. | | | |

**Table S-7**. values of ISF (% of total body weight) and gut passage time (GPT; h) used to calculate active carbon transport. Where values were not available for specific species of fish the average ISF and GPT for mesopelagic fish were applied. Only organisms that were undergoing DVM are included. Where dw = dry weight (mg), cw = carbon weight (mg), T = temperature (ºC), and FP = daily fecal pellet production.

| **Taxa** | **ISF** | | **GPT** |
| --- | --- | --- | --- |
| Fish1,2 | 3.2625 | | 2.631579 |
| Lophiiformes1,2 | 2.0988 | | 2.631579 |
| Myctophidae3,4 | 2.1 | | 4.201681 |
| Hygophum sp1,2 | 3.2625 | | 1.92 |
| Scopelopsis sp1,2 | 3.2625 | | 2.631579 |
| Lampanyctus sp1,5 | 3.2625 | | 6.024096 |
| Phosichthyidae1,2 | 3.2625 | | 2.631579 |
| Sternoptychidae1,2 | 3.2625 | | 4.55 |
| Cephalopoda6,7 | 0.042 | | 2 |
| Euphausiacea8 | 1.2 | | 2.3 |
| Copepoda, Polychaete, and Molluska9,10 | 1.2 | | 1.042 |
| Amphipoda11,12 | 5.3 | | 4.8 |
| Decapoda13,14,15 | ISF = 0.0104*dwmg | | 1.5 |
| Chaetognath16 | 36.6 | |  |
| Pyrosome17,18 | FP = 0.25 * cwmg | | 1.43 |
| **References**  1 Hajisamae et al., 2003  2 Clarke, 1978  3 Pakhomov et al., 1996  4 Baird et al. 1975  5 Holton, 1969  6 Alegre et al., 2014  7 Lipinski 1987  8 Perissinotto and Pakhomov, 1996  9 Dagg and Wyman, 1983 | | 10 Reinfelder and Fisher, 1994  11 Froneman et al., 2000  12 Diebel, 1988  13 Podeswa, 2012  14 Beseres et al. 2006  15 Pakhomov et al., 2018  16 Stuart and Verheye, 1991  17 Drits et al., 1992  18 Henschke et al., 2019 | |

**Table S.8.** Day/night avoidance variability correction and overall net avoidance calculation for migratory micronekton carbon fluxes (mg C m-2 d-1) out of the MLD in the B-CCE and WCE, and carbon recycling (values in brackets) in the R-WCE. Micronekton biomass is first corrected for diel differences in net avoidance (*see Section 4.2*), and then for overall micronekton net avoidance assuming a net efficiency of 14% (Koslow et al., 1997). MF = mortality flux, RF = respiratory flux, EF = excretory flux, and GF = gut flux.

|  | Raw  (mg C m-2 d-1) | | | | |  | *Correction for differential day/night avoidance (mg C m-2 d-1)* | | | | |  | *Corrected for overall net avoidance 14%*  *(mg C m-2 d-1)* | | | | |
| --- | --- | --- | --- | --- | --- | --- | --- | --- | --- | --- | --- | --- | --- | --- | --- | --- | --- |
| Water mass | MF | RF | EF | GF | *Total* |  | MF | RF | EF | GF | *Total* |  | MF | RF | EF | GF | *Total* |
| B-CCE | 0.16 | 0.17 | 0.052 | 0.0007 | 0.38 |  | 0.16 | 0.16 | 0.052 | 0.0007 | *0.38* |  | 1.1 | 1.2 | 0.4 | 0.01 | *2.7* |
|  |  |  |  |  |  |  |  |  |  |  |  |  |  |  |  |  |  |
| R-WCE* | 0.50  (0.57) | 0.56  (0.63) | 0.17  (0.19) | 0.30  (0.41) | 1.53  (1.80) |  | 0.48  (0.53) | 0.54  (0.60) | 0.17  (0.19) | 0.25  (0.35) | *1.45*  *(1.67)* |  | 3.43  (3.79) | 3.86  (4.29) | 1.21  (1.36) | 1.79  (2.5) | *10.29*  *(11.9)* |
|  |  |  |  |  |  |  |  |  |  |  |  |  |  |  |  |  |  |
| WCE | 2.22 | 2.75 | 0.85 | 0.89 | 6.71 |  | 2.22 | 2.75 | 0.85 | 0.88 | *6.70* |  | 15.86 | 19.64 | 6.07 | 6.29 | *47.86* |
| *R-WCE mesozooplankton were recycling carbon in the top 100 m of the water, while *P. atlanticum* (100%) and a portion of the myctophid (56%) and decapod (58%) populations were exporting carbon below the MLD in the R-WCE | | | | | | | | | | | | | | | | | |

**References**

Alegre, A., Ménard, F., Tafur, R., Espinoza, P., Argüelles, J., Maehara, V., Oswaldo, F., and Monique, S. (2014). Comprehensive model of jumbo squid *Dosidicus gigas* trophic ecology in the northern humboldt current system. *PLoS One* 9. doi:10.1371/journal.pone.0085919.

Alpoim, R., Avila de Mel, A., Banon, R., Casas, M., Cervina, S., Junquera, S., Martin, I., Murua, H., Paz, X., Perez-Ganadaras, G., del Rio, J.L., Rodriguez-Marin, E., Saborida-Rey, F., dos Santos, E.J., and Vazquez, A. (2002). Distribution and Main Characteristic of Fish Species on Flemish Cap Based on the 1988-2002 EU-Surveys in July.

Bernardes, R.A., and Wongtschowski, C.L.D.B.R. (2000). Length-weight relationship of small pelagic fish species of the southeast and South Brazilian Exclusive Economic Zone. Naga, the ICLARM Quarterly, 23(4), pp. 30-32.

Beseres, J. J., Lawrence, A. L., and Feller, R. J. (2006). Practical equivalence of laboratory and field measurements of gut passage time in two penaeid shrimp species. *Mar. Ecol. Prog. Ser.* 309, 221–231. doi:10.3354/meps309221.

Childress, J. J., Cowles, D. L., Favuzzi, J. A., and Mickel, T. J. (1990). Metabolic rates of benthic deep-sea decapod crustaceans decline with increasing depth primarily due to the decline in temperature. *Deep Sea Res. Part A. Oceanogr. Res. Pap.* 37, 929–949. doi:10.1016/0198-0149(90)90104-4.

Clarke, T.A. (1978). Diel feeding patterns of 16 species of mesopelagic fishes from Hawaiian Waters. *Fish. Bull.* 76: 495-513.

Dagg, M. J., and Wyman, K. D. (1983). Natural ingestion of the copepods *Neocalanus plumchrus* and *N. cristatus* calculated from gut contents. *Mar. Ecol. Prog. Ser.* 13, 37–46.

Davis, C. S., and Wiebe, P. H. (1985). Macrozooplankton biomass in a warm-core Gulf Stream ring: time series changes in size structure, taxonomic composition, and vertical distribution. *J. Geophys. Res.* 90, 8871–8884. doi:10.1029/JC090iC05p08871.

Davison, P. C. (2011). The Export of Carbon Mediated by Mesopelagic Fishes in the Northeast Pacific Ocean. *PhD Thesis, Univ. California, San Diego USA*.

Defeo, O., and Martnez, G. (2003). The habitat harshness hypothesis revisited: life history of the isopod *Excirolana braziliensis* in sandy beaches with contrasting morphodynamics. *J. Mar. Biol. Assoc. UK* 83, 331–340. doi:10.1017/S0025315403007161hDiebel, C. E. (1988). Observations on the Anatomy and Behavior of *Phronima sedentaria* ( Forskål ) ( Amphipoda : Hyperiidea ). *J. Crustac. Biol.* 8, 79–90.

Donnelly, J., Torres, J.J. (1988). Oxygen consumption of midwater fishes and crustaceans from the eastern Gulf of Mexico. *Mar. Biol.* 97: 483-494.

Drits, A. V., Arashkevich, E. G., and Semenova, T. N. (1992). *Pyrosoma atlanticum* (Tunicata, Thaliacea): Grazing impact on phytoplankton standing stock and role in organic carbon flux. *J. Plankt. Res.* 14(6), 799–809. https://doi.org/10.1093/plankt/14.6.799Feigenbaum, D. (1979). Daily ration and specific daily ration of the chaetognath *Sagitta enflata*. *Mar. Biol.* 54, 75–82. doi:10.1007/BF00387053

Froese, R., Thorson, J. T., and Reyes, R. B. (2014). A Bayesian approach for estimating length-weight relationships in fishes. *J. Appl. Ichthyol.* 30, 78–85. doi:10.1111/jai.12299.

Froneman, P. W., Pakhomov, E. A., and Treasure, A. (2000). Trophic importance of the hyperiid amphipod, *Themisto gaudichaudi,* in the Prince Edward Archipelago (Southern Ocean) ecosystem. *Polar Biol.* 23, 429–436. doi:10.1007/s003000050464.

Haddad, M.A., and Nogueira, M. (2006). Reappearance and seasonality of *Phyllorhiza punctate* von Lendenfeld (Cnidaria, Scyphozoa, Rhozostomeae) medusae in southern Brazil. *Rev. Brazs. Zool.* 23(3): 824-831.

Henschke, N., Pakhomov, E. A., Kwong, L. E., Everett, J. D., Laiolo, L., Coghlan, A. R., et al. (2019). Large vertical migrations of *Pyrosoma atlanticum* play an important role in active carbon transport. *J. Geophys. Res. Biogeosciences* 124, doi:10.1029/2018JG004918.

Holton, A.A. (1969). Feeding behavior of a vertically migrating laternfish. *Pac. Sci.* 23: 325-333.

Ikeda, T. (2013). Respiration and ammonia excretion of euphausiid crustaceans: Synthesis toward a global-bathymetric model. *Mar. Biol.* 160, 251–262. doi:10.1007/s00227-012-2150-z.

Ikeda, T. (2014). Synthesis toward a global model of metabolism and chemical composition of medusae and ctenophores. *J. Exp. Mar. Bio. Ecol.* 456, 50–64. doi:10.1016/j.jembe.2014.03.006.

Ikeda, T. (2014). Synthesis toward a global model of metabolism and chemical composition of medusae and ctenophores. *J. Exp. Mar. Bio. Ecol.* 456, 50–64. doi:10.1016/j.jembe.2014.03.006.

Kiørboe, T. (2013). Zooplankton body composition. *Limnol. Oceanogr.* 58, 1843–1850. doi:10.4319/lo.2013.58.5.1843.

Lindsay, D.J., 2003. Carbon and nitrogen contents of mesopelagic organisms: Results from Sagami Bay, Japan. *Jamstec* 22, 2–15.Lipiński, M. R. (1990). Changes in pH in the caecum of *Loligo vulgaris reynaudii* during digestion. *South African J. Mar. Sci.* 9, 43–51. doi:10.2989/025776190784378655.

Mizdalski, E. (1988). Weight and length data of zooplankton in the Weddell Sea in austral spring 1986 (ANT V/3). *Ber. Polarforsch.* 55. ISSN 0176-5027

Pakhomov, E. A., Perissinotto, R., and Mcquaid, C. D. (1996). Prey composition and daily rations of myctophid fishes in the Southern Ocean. *Mar. Ecol. Prog. Ser.* 134, 1–14.

Pakhomov, E. A., Podeswa, Y., Hunt, B. P. V, Kwong, L. E., and Woodson, C. B. (2018). Vertical distribution and active carbon transport by pelagic decapods in the North Pacific Subtropical Gyre. *ICES J. Mar. Sci.* doi:10.1093/icesjms/fsy134.

Perissinotto, R., and Pakhomov, E. A. (1996). Gut evacuation rates and pigment destruction in the Antarctic krill *Euphausia superba*. *Mar. Biol.* 125, 47–54. doi:10.1007/BF00350759.

Podeswa, Y. (2012). Active carbon transport and feeding ecology of pelagic decapods in the North Pacific subtropical gyre. *MS Thesis, Univ. Br. Columbia, Vancouver*.

Reinfelder, J. R., and Fisher, N. S. (1994). The assimilation of elements ingested by marine planktonic bivalve larvae. *Limnology* 39, 12–20.

Strong, K.W., and Daborn, G.R. (1979). Growth and energy utilisation of the intertidal isopod *Idotea baltica* (Pallas) (Crustacea: Isopoda). *J. Exp. Mar. Bio. Ecol.* 41, 101–123.doi:10.1016/0022-0981(79)90046-7

Stuart, V., and Verheye, H. M. (2008). Diel migration and feeding patterns of the chaetognath, *Sagitta friderici*, off the west coast of South Africa. *J. Mar. Res.* 49, 493–515. doi:10.1357/002224091784995819.

Uye, S., and Simauchi, H. (2005). Population biomass, feeding, respiration and growth rates, and carbon budget of the scyphomedusa *Aurelia aurita* in the Inland Sea of Japan. *J. Plankt. Res.* 27(3): 237-248. doi.org/10.1093/plankt/fbh172

Villanueva, R., and Guerra, A. (1991). Food and prey detection in two deep-sea cephalopods: *Opisthoteuthis agassizi* and *O.vossi* (Octopoda: Cirrata). *Bull. Mar. Sci.* 49(1-2): 288-299.
